# Supplementary material for: Type II transmembrane domain hydrophobicity dictates the cotranslational dependence for inversion
Source: PubMed Central journal article supplement — Mol Biol Cell. 2014 Nov 1;25(21):3363–74. doi: 10.1091/mbc.E14-04-0874 (PMC4214783; doi:10.1091/mbc.e14-04-0874), 2014-11-01
Supplement: supp_E14-04-0874v1_CombinedSupMats.pdf [file supp_E14-04-0874v1_CombinedSupMats.pdf]

# Supplemental Materials

*Molecular Biology of the Cell*

Dou et al.

**Supplemental Materials for:**

**Type II transmembrane domain hydrophobicity dictates the co-translational dependence for inversion**

Dan Dou, Diogo V da Silva, Johan Nordholm, Hao Wang, and Robert Daniels\*

*Center for Biomembrane Research, Department of Biochemistry and Biophysics, Stockholm University, SE-106 91 Stockholm, Sweden.*

\*Correspondence: robertd@dbb.su.se; +46 8 162460

### **Single-cell approach to monitor plasma membrane localization**

To monitor the plasma membrane (PM) localization of a protein in an unbiased manner, we established a semi-automated approach that compares the mean intensity of a substrate at the PM to the intracellular (IC) region at the single-cell level (Supplemental Fig. 1A). As a control for the approach, Vero cells were co-transfected with plasmids expressing GFP with an N-terminal TMD (TMD-GFP) and RFP for a cellular marker (step -i-). At 48 h post-transfection, live and fixed cells were prepared for confocal microscopy and multiple cell section images were taken (step -ii-). Each image was then processed using Cell profiler 2.0 software (Kamentsky et al., 2011) with the following parameters. The RFP signal identified each 'cell' boundary  $\geq 350 \mu\text{m}^2$ , the lower edge of the normal cell size distribution (step -iii-). The PM region was defined as the peripheral area  $0.5 \mu\text{m}$  in-and-out from the RFP boundary (step -iv-). The intracellular (IC) region was defined as the area surrounded by the PM region (step -v-). The ratio of the mean fluorescent signal for the PM and IC regions were then calculated for each cell (step -vi-).

The signal from the RFP and the DAPI stained nucleus were used to determine the threshold IC value, and the signal from wheat germ agglutinin (WGA) and the protein marker TMD-GFP were used to establish the PM values. Analysis of the different cell populations gave average PM/IC ratios of  $\sim 0.5$  for the IC localized targets and the ratios for the individual cells were all  $< 1$  (Supplemental Fig. 1B and C). For the PM controls WGA and TMD-GFP, the average PM/IC ratios were  $\sim 3$  and  $\sim 2$ , respectively for 100-200 cells, and all the individual cell PM/IC ratios were  $> 1$ . Both live and fixed cells showed cell-to-cell variation in the PM/IC ratios, but this was most notable for WGA, which was extremely sensitive to the image acquisition time after fixation or the staining time for the live cell analysis. Based on these results, PM localized substrates should have a PM/IC ratio  $> 1$  and IC localized substrates should have a ratio  $< 1$  using this approach.

### **SUPPLEMENTAL MATERIALS REFERENCE**

Kamentsky, L., Jones, T.R., Fraser, A., Bray, M.A., Logan, D.J., Madden, K.L., Ljosa, V., Rueden, C., Eliceiri, K.W., and Carpenter, A.E. (2011). Improved structure, function and compatibility for CellProfiler: modular high-throughput image analysis software. *Bioinformatics* 27, 1179-1180.

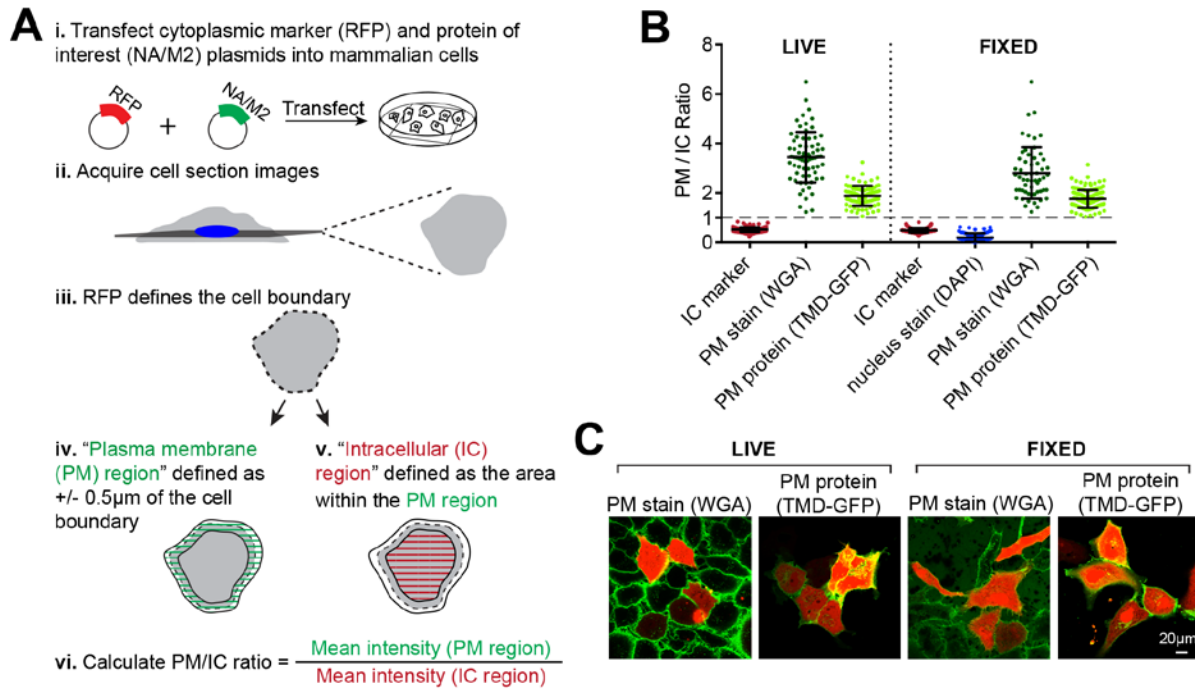

**SUPPLEMENTAL FIGURE 1: Single-cell microscopy assay to monitor PM localization.** (A) Outline of the experimental approach. Cells were transfected with a cytoplasmic marker (RFP) and the TMD construct of interest, and image sections were obtained by confocal microscopy. The images were then processed using Cell profiler 2.0 where RFP defines the cell boundary. The mean intensity of the TMD construct in the plasma membrane (PM) region, defined as 0.5 µm in-and-out from the cell boundary, was calculated. Finally, the PM mean intensity was normalized to that of the intracellular region (IC), defined as the area surrounded by the PM region. (B) The PM/IC values obtained from fixed and live cell controls are displayed with the IC marker RFP. (C) Representative images of fixed and live cell sections are shown for samples where the PM was labeled with WGA, or TMD-GFP, and the IC region with RFP.

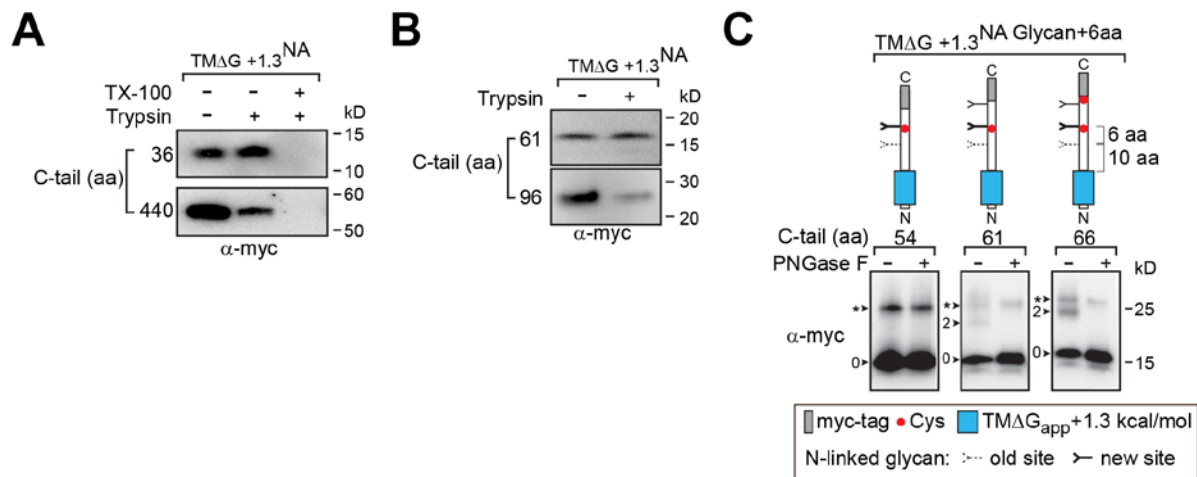

**SUPPLEMENTAL FIGURE 2: NA trypsin protection and glycosylation analysis of constructs with a shifted glycosylation site.** (A) Immunoblots of lysates obtained from cells expressing the indicated constructs. Prior to harvesting, the cells were incubated in the absence and presence of trypsin to determine if the myc epitope was properly positioned on the extracellular side of the plasma membrane. The digestion was performed on detergent (TX-100) solubilized cells to confirm the epitope is sensitive to trypsin. Note the decrease in the signal on the full-length construct with the 440 aa C-tail, but not with the 36 aa C-tail. (B) Similar analysis using the PM localized, unglycosylated, NA construct with a 61 aa C-tail and the glycosylated construct with a 96 aa C-tail. The glycosylated construct (C-tail 96 aa) is properly orientated and trypsin sensitive, whereas the unglycosylated construct (C-tail 61 aa) is not properly inverted even though it localizes to the PM. (C) Glycosylation site positioning is not responsible for the low glycosylation efficiency of the NA constructs with a marginally hydrophobic TMD. Transfected cell lysates expressing the indicated constructs with the natural glycosylation site moved 6 aa further from the membrane were either untreated, or treated, with PNGase F, separated by SDS-PAGE, and immunoblotted. The number of N-linked glycans is indicated, and the SDS resistant TMD dimer is depicted with an asterisk.



|                        |      |    |      |                                  |       |
|------------------------|------|----|------|----------------------------------|-------|
| sp Q5VSG8 MANEL_HUMAN  | 457  | 27 | 428  | RRRRRACIALFLVLLFAFGTLMGLRTL      | -3.88 |
| sp Q9UL52 TM11E_HUMAN  | 423  | 27 | 378  | WVIGLVFISLIVLAVCIGLTVHYVRY       | -3.88 |
| sp O14638 ENPP3_HUMAN  | 875  | 31 | 827  | LKKYKIACIVLLALLVMSLGLGLGLRKL     | -3.87 |
| sp Q92935 EXTL1_HUMAN  | 676  | 25 | 642  | LWLALSASVLLVLLGGFSLRLAL          | -3.87 |
| sp Q9H4F1 SIA7D_HUMAN  | 302  | 33 | 264  | RLVLILCSVVFSAVYLLCCWAGLPLCLATCL  | -3.86 |
| sp Q9UH99 SUN2_HUMAN   | 717  | 25 | 463  | LKTFWFLPLLLLTLCTYGAWYFY          | -3.86 |
| sp Q9UIQ6 LCAP_HUMAN   | 1025 | 29 | 889  | ARTMVVCAFVIVAVSVIMVYLLPRCTF      | -3.85 |
| sp Q9H3R1 NDST4_HUMAN  | 872  | 28 | 838  | LRRSFRTLIVLATFCLVSVISAYFLY       | -3.83 |
| sp Q96JF0 SIAT2_HUMAN  | 529  | 24 | 498  | WRQRMLFGIFAWGLLFLFIYFT           | -3.83 |
| sp Q9NRS4 TMPS4_HUMAN  | 437  | 32 | 374  | VGPIIIALLSLASIIIVVLIKVILDKYYFL   | -3.75 |
| sp Q9H0X4 ITFG3_HUMAN  | 552  | 27 | 480  | RCRAAAFFLSLFLCLFVVFVSVFVPC       | -3.73 |
| sp Q5KU26 COL12_HUMAN  | 742  | 29 | 680  | WALKFSIILLYLCALLTITVAILGYKVV     | -3.71 |
| sp Q6ZMR5 TM11A_HUMAN  | 421  | 30 | 377  | LKPWMAVILVLSLTVAVTIGLLVHFLVF     | -3.71 |
| sp O60476 MA1A2_HUMAN  | 641  | 28 | 584  | TLRLSEKIFILLILSAFITLFCGAFFFL     | -3.68 |
| sp Q07837 SLC31_HUMAN  | 685  | 28 | 570  | ILFWLTVASVVLVIAATIIAIALSPKCL     | -3.68 |
| sp Q6P4E1 CAS4_HUMAN   | 433  | 28 | 398  | RRAGRLPSLVLLVLLVVIVLAFNYWSI      | -3.64 |
| sp Q16842 SIA4B_HUMAN  | 350  | 23 | 323  | LRVWFSLVAFLLVFIMSLFFTY           | -3.64 |
| sp Q9NQX7 ITM2C_HUMAN  | 267  | 28 | 182  | VCYLSMGMVLLMGLVFAVSVIYRYFFL      | -3.63 |
| sp Q96E93 KLRG1_HUMAN  | 195  | 25 | 134  | CLVAIALGLLTVALLVLLYQWILC         | -3.63 |
| sp Q00973 B4GN1_HUMAN  | 533  | 28 | 505  | MWLGRRALCALVLLACASLGLLYASTR      | -3.62 |
| sp Q6ZS10 CL17A_HUMAN  | 378  | 26 | 185  | RWMVYVCLLVVTLFLGCLGLVTLI         | -3.62 |
| sp Q2HXU8 CL12B_HUMAN  | 276  | 28 | 211  | IWRHAALGLVTLCLMLLIGLVTGMMFL      | -3.61 |
| sp A0FJZ3 GLXLT2_HUMAN | 443  | 25 | 416  | LRSKAAALLLALAALLLALLSLRA         | -3.6  |
| sp Q43508 TNF12_HUMAN  | 249  | 33 | 199  | TALLVPLALGLGLACLGLLAVVLSGRASL    | -3.59 |
| sp Q04609 FOLH1_HUMAN  | 750  | 25 | 707  | RWLACAGALVLAGGFLLGFLGFWFI        | -3.58 |
| sp P51164 ATP4B_HUMAN  | 291  | 30 | 228  | LSRWVWISLYYAFYVVMTGTFALCLYVLM    | -3.56 |
| sp Q9C0J1 B3GN4_HUMAN  | 378  | 28 | 325  | MLCRLCWLVSYSLAVLLGCLFLRKA        | -3.55 |
| sp Q8N6G5 CGAT2_HUMAN  | 542  | 23 | 510  | TRTWLHLLGLALLCSLFLFMYLL          | -3.55 |
| sp Q8N3T1 GLT15_HUMAN  | 639  | 22 | 606  | CRLOFLLLLMLGCVLMMVAML            | -3.55 |
| sp Q95502 NPTXR_HUMAN  | 500  | 28 | 470  | FLAVLLAAGMLAFLGAVICIASVPLAA      | -3.55 |
| sp P16442 BGAT_HUMAN   | 354  | 22 | 317  | ALRPMILFLIMLVLFVGYGV             | -3.54 |
| sp Q9UJ37 SIA7B_HUMAN  | 374  | 24 | 343  | FWWLLLLTAACSGLLFALYFSAV          | -3.54 |
| sp Q9Y673 ALG5_HUMAN   | 324  | 29 | 292  | LLLQAVLGAALAAALVLSIVAFMTAT       | -3.53 |
| sp Q9NR71 ASA2_HUMAN   | 780  | 26 | 746  | LETFLFLLVMSAITVALLSLLFIT         | -3.51 |
| sp P42857 NSG1_HUMAN   | 185  | 27 | 79   | RFKVSVLVLFALFLTCVFLVYKYVY        | -3.49 |
| sp P28907 CD38_HUMAN   | 300  | 24 | 253  | LCLGSVLLVLLVAVVPRWR              | -3.46 |
| sp P33908 MA1A1_HUMAN  | 653  | 29 | 591  | AALRLTEKFLVLLVFSAFITLFCGAIFFL    | -3.45 |
| sp Q8N1L4 CP422_HUMAN  | 340  | 25 | 307  | LMAHPLLILLCMSLLLFQVIRLY          | -3.44 |
| sp Q86W10 CP421_HUMAN  | 505  | 25 | 472  | LMAHPLLILLCMSLLLFQVIRLY          | -3.44 |
| sp Q43529 CHSTA_HUMAN  | 356  | 25 | 327  | WLLLAACVWFVFMFVASKFITLTF         | -3.41 |
| sp P32971 TNFL8_HUMAN  | 234  | 25 | 172  | YFLTTLTALCLVFTVATIMVLV           | -3.41 |
| sp P26572 MGAT1_HUMAN  | 445  | 25 | 414  | AGLVWGALFVAVNALLLFFWTR           | -3.4  |
| sp Q96FL9 GLT14_HUMAN  | 552  | 25 | 525  | RLTRRLVLPVFGVLWITVFFWVT          | -3.38 |
| sp P06734 FCER2_HUMAN  | 321  | 30 | 276  | RCRRGTQVLLGLVTAALWAGLLTLLLLW     | -3.37 |
| sp Q49576 MMEL1_HUMAN  | 779  | 25 | 731  | FLEGGLLLLLVTAALVALGVLYA          | -3.37 |
| sp Q96AG4 LRC59_HUMAN  | 307  | 27 | 36   | WAVLKLHLLLVFVAGVGLVACRVTEL       | -3.34 |
| sp P78380 OLR1_HUMAN   | 273  | 32 | 213  | FLYSPWGLAAATGLVCLGLVVTIMVGMQL    | -3.34 |
| sp P05026 AT1B1_HUMAN  | 303  | 30 | 242  | WFKILLFYVIFYGCLAGIFGTQVMLLTI     | -3.33 |
| sp Q6UXB4 CLC4G_HUMAN  | 293  | 27 | 240  | WSRRPLFALAVLVTTLVAVLISILL        | -3.31 |
| sp P36269 GGT5_HUMAN   | 586  | 31 | 555  | MARGYGATVSLVLLGLGLAVIVLAVLSR     | -3.31 |
| sp Q8NF37 PCAT1_HUMAN  | 534  | 30 | 457  | LMTLTLFPVRLVAAAMMLLAWPLAVASL     | -3.31 |
| sp Q11128 FUT5_HUMAN   | 374  | 26 | 338  | WLWRRCLAGLLFOLLVAVCFYSYLRV       | -3.28 |
| sp O75900 MMP23_HUMAN  | 390  | 25 | 348  | LLRVLGAALVALCCLPALVLLARLGA       | -3.28 |
| sp Q06643 TNFC_HUMAN   | 244  | 29 | 197  | LLAVAGATSLVTLVAVPITVAVLAVLV      | -3.27 |
| sp P26718 NKG2D_HUMAN  | 216  | 27 | 137  | FFFCFIAVAMGIRFIMVAIVSAVFL        | -3.26 |
| sp Q95672 ECEL1_HUMAN  | 775  | 26 | 690  | VCLLSGLVFAAGLCAILAAMLALKYL       | -3.25 |
| sp P42167 LAP2B_HUMAN  | 454  | 22 | 20   | VWIKILLFVVAVFLVLYQAM             | -3.23 |
| sp P08473 NEP_HUMAN    | 750  | 30 | 698  | WRTPLEISLVLVLLTIAVTMIALYATY      | -3.22 |
| sp Q96MM7 H6S2_HUMAN   | 605  | 20 | 432  | LLLAVMLFLFAVIVLQYVC              | -3.2  |
| sp O75063 XYLK_HUMAN   | 409  | 23 | 384  | LKQRVLLAILVIFITKVFLLI            | -3.2  |
| sp O15466 SIA8E_HUMAN  | 376  | 26 | 339  | LLGSRLLTFIFICAFALVTLQOILY        | -3.17 |
| sp P26715 NKG2A_HUMAN  | 233  | 28 | 135  | LIVGILGICLIMASVTVIVIPSTLI        | -3.16 |
| sp Q9Y3Q0 NALD2_HUMAN  | 740  | 28 | 706  | RLYLWMCALAAALASFLMGFMGWFIKPL     | -3.14 |
| sp Q6L9W6 B4GN3_HUMAN  | 998  | 28 | 953  | LLRRFRLLLALAVVSVGLWTLVLELVA      | -3.13 |
| sp Q6ZWK6 TM11F_HUMAN  | 438  | 30 | 385  | FWDSVRLALFTLAVIAGIAGIVTHFV       | -3.13 |
| sp Q9NR34 MA1C1_HUMAN  | 630  | 27 | 587  | LRLPKQFLFLSLGLVTLFCGALFL         | -3.07 |
| sp Q9UP52 TFR2_HUMAN   | 801  | 27 | 696  | RRAAPYLVLLALIFTGAFLLGYVAFR       | -3.06 |
| sp Q8IUN9 CLC10_HUMAN  | 316  | 20 | 256  | LLLGLGLLHLLVIGVGF                | -3.02 |
| sp Q43736 TM2A_HUMAN   | 263  | 28 | 184  | RCMLTLGLSFLIAGLIVGGACIYKYFM      | -2.98 |
| sp Q9UJ71 CLC4K_HUMAN  | 328  | 26 | 260  | TVRAALICLTLVAVSLLQAVLYPRFM       | -2.96 |
| sp Q92838 EDA_HUMAN    | 391  | 26 | 326  | FLGFFGFLSLALHLLTCCYLELR          | -2.96 |
| sp Q9Y2C3 B3GT5_HUMAN  | 310  | 23 | 282  | MLRMVYCLLVGALCLYFMSYSL           | -2.91 |
| sp Q6NSJ0 K1161_HUMAN  | 714  | 24 | 634  | LIGSAVLGULLVLAAVVAVCYYSV         | -2.91 |
| sp P01375 TNFA_HUMAN   | 233  | 24 | 182  | RRCLFLSLFSLVAVAGATTLFCLL         | -2.9  |
| sp Q6LXN8 CLC9A_HUMAN  | 241  | 28 | 182  | ACCLVMVISCVFCMGLLTAISIFGVKLL     | -2.89 |
| sp O60909 B4GT2_HUMAN  | 372  | 29 | 336  | TLERVCKAVLLCCLHFLVAVILYFDVYA     | -2.87 |
| sp Q93063 EXT2_HUMAN   | 718  | 24 | 672  | RIYYITLFSIVLLGIATGMFQFV          | -2.85 |
| sp Q43173 SIA8C_HUMAN  | 380  | 28 | 347  | MARVASVLGLVMSVALLLILSIVSL        | -2.84 |
| sp Q6EIG7 CLC6A_HUMAN  | 209  | 33 | 162  | WLSRLRWSVAGISIALSACFIVSVCVYHYFTY | -2.82 |
| sp Q43825 B3GT2_HUMAN  | 422  | 22 | 379  | LFRTHLIGVLSLVLFAMFLFF            | -2.81 |
| sp P02786 TFR1_HUMAN   | 760  | 24 | 671  | ICYGTIAVIVFFLGFIMGYLYGC          | -2.81 |
| sp Q8WXI8 CLC4D_HUMAN  | 215  | 25 | 173  | LIPSVIAVVFILLSVCFIASCLVT         | -2.77 |
| sp Q07108 CD69_HUMAN   | 199  | 24 | 135  | VLCAMNVVFTITLIALIALSVG           | -2.76 |
| sp P21217 FUT3_HUMAN   | 361  | 24 | 325  | WRRCLAALLFOLLVAVCFYSYLRV         | -2.75 |
| sp Q9ULY5 CLC4E_HUMAN  | 219  | 29 | 170  | MFLWTVAGIPIFLSACFITRCVVFTRIF     | -2.74 |
| sp O60344 ECE2_HUMAN   | 883  | 27 | 680  | LELVLAGASLLAALLGCLVALGVQY        | -2.73 |
| sp Q9NXG6 P4HTM_HUMAN  | 502  | 28 | 420  | ICSRAYFLVLMVVFHLYGNVLALLLV       | -2.73 |
| sp Q9NP25 B3GA2_HUMAN  | 323  | 26 | 294  | ALFTRFFILLPVILVIMLDVDTTR         | -2.72 |
| sp Q6IAN0 DRS7B_HUMAN  | 325  | 28 | 280  | FITSTAILPLFGCLGVGLFRLLQWVR       | -2.7  |
| sp Q3V5L5 MGTS5_HUMAN  | 792  | 26 | 751  | LVTLRPPRFLVIGIGFTLCLFMTSL        | -2.67 |
| sp Q9NUM4 T106B_HUMAN  | 274  | 25 | 157  | RTKLYMVASVFCVLLSGLAVFFLF         | -2.67 |
| sp Q13061 TRDN_HUMAN   | 729  | 24 | 658  | AAWLLVIALIITVSAVAIVMFDLV         | -2.67 |
| sp Q9HCO5 GALT9_HUMAN  | 603  | 24 | 573  | IRTLTVNIVFVGVILFVSYCR            | -2.65 |
| sp Q76KP1 B4GN4_HUMAN  | 1039 | 19 | 1008 | MKLLLLLLLLSCAAWLTYY              | -2.64 |
| sp P07306 ASGR1_HUMAN  | 291  | 22 | 230  | RILLSLGLSLLLVVVCVIGS             | -2.62 |
| sp Q7L1S5 CHST9_HUMAN  | 443  | 23 | 408  | VFLSVLIFVAGLHLLFMVLOVWI          | -2.59 |
| sp Q7Z7M9 GALT5_HUMAN  | 940  | 29 | 905  | FFRSGRVLAFIFAVSVIILLFDMAALRL     | -2.59 |
| sp Q43557 TNF14_HUMAN  | 240  | 27 | 179  | VARVGLGLLLLLMGAGLAVQGWFLQL       | -2.58 |
| sp Q95150 TNF15_HUMAN  | 251  | 24 | 195  | ARWALTCLVLPFLAGLTYLLV            | -2.58 |
| sp Q9H2S6 TNMD_HUMAN   | 317  | 22 | 267  | LKICGLVFGILALTLVILVFGS           | -2.58 |
| sp P07307 ASGR2_HUMAN  | 311  | 29 | 234  | LAQRCLSMVCFSLALSFNILLVVICVT      | -2.57 |
| sp Q9Y644 RFNG_HUMAN   | 331  | 23 | 302  | ALCRACLALAAALALLPLPL             | -2.57 |
| sp O15393 TMPS2_HUMAN  | 492  | 26 | 383  | ALCITLTLGTFVGAALAGLLWKFM         | -2.57 |
| sp Q96SE0 ABHD1_HUMAN  | 405  | 26 | 368  | TWDTFSLLLAVALYLYGYWACVL          | -2.56 |
| sp O75752 B3GL1_HUMAN  | 331  | 24 | 293  | LRSLKWSLLLLSLLSFFVMWVYLSL        | -2.55 |

|                       |      |    |      |                                  |       |
|-----------------------|------|----|------|----------------------------------|-------|
| sp Q11206 SIA4C_HUMAN | 333  | 20 | 308  | RWKLAMLALVLMVWYSI                | -2.55 |
| sp Q8NFS9 GNT2C_HUMAN | 402  | 23 | 377  | FWRYCFATLLSVIVFRFYSS             | -2.54 |
| sp Q9Y275 TN13B_HUMAN | 285  | 26 | 213  | LLAATLLALLSCCLTVVSYQVAAL         | -2.53 |
| sp Q6UVW9 CLC2A_HUMAN | 174  | 24 | 125  | WKIGLMCLFSIIITVCIIMATW           | -2.51 |
| sp Q14435 GALT3_HUMAN | 633  | 20 | 594  | FWKLGAVFFFIIVLVMQR               | -2.51 |
| sp Q58DX5 NADL2_HUMAN | 795  | 22 | 649  | VLKILGTATILFIFIGLIGYV            | -2.5  |
| sp Q11201 SIA4A_HUMAN | 340  | 20 | 314  | RTLKVLTLVFLFSLTFFL               | -2.5  |
| sp Q95803 NDST3_HUMAN | 873  | 25 | 838  | FORTVILLATFCMVSIISAYLLYS         | -2.48 |
| sp Q09327 MGAT3_HUMAN | 533  | 27 | 504  | MRRYKFLMFCMAGLCLISLHFFKTL        | -2.46 |
| sp P19526 FUT1_HUMAN  | 365  | 19 | 338  | LCLAFLLVCVLSVIFLHI               | -2.45 |
| sp Q8NES3 LFNG_HUMAN  | 379  | 23 | 353  | RCGRRLLLALAGALLACLLVLT           | -2.45 |
| sp Q9H2A9 CHST8_HUMAN | 424  | 25 | 393  | TMRLACMFSSILLFGAAGLLFISL         | -2.43 |
| sp P05981 HEPS_HUMAN  | 417  | 28 | 372  | VAALTAGTLLLLTAIGASWAIVALLR       | -2.43 |
| sp Q6IS24 GLTL3_HUMAN | 598  | 26 | 569  | LRRVKVLVNLNIAVAGFVFLAKCR         | -2.42 |
| sp Q9Y662 HS3SB_HUMAN | 390  | 24 | 338  | VRRKLALLFAMLCVWLYMFLYSCA         | -2.42 |
| sp Q94901 SUN1_HUMAN  | 812  | 30 | 476  | FLLTRCLRNICKFLVLIPLFLLAGLSLR     | -2.42 |
| sp P42892 ECE1_HUMAN  | 770  | 24 | 679  | RLVVVLVLAAGLVAGLAALGIQY          | -2.39 |
| sp Q96L58 B3GT6_HUMAN | 329  | 22 | 295  | LLRRWRRRRAALGLTLALCGAALLYLARCAA  | -2.36 |
| sp Q8IXA5 SACA3_HUMAN | 215  | 23 | 133  | LRRRWCPAGIMLLALVCLLSCLL          | -2.34 |
| sp Q92186 SIA8B_HUMAN | 375  | 22 | 349  | FRSWMLAALLTLLVFLIFADIS           | -2.34 |
| sp P51993 FUT6_HUMAN  | 359  | 26 | 323  | WSWRCCLTLLFQLLMAVCFSSYLRV        | -2.33 |
| sp Q12918 KLRB1_HUMAN | 225  | 28 | 159  | FALKSCAGIILLVVTGLSVSVTSLI        | -2.3  |
| sp Q9UEW3 MARCO_HUMAN | 520  | 32 | 443  | LAVVVIYLLITAGAGLLVQVQLNQAARLVL   | -2.29 |
| sp Q12797 ASPH_HUMAN  | 758  | 27 | 680  | TSFFTFWFIALLGVWTSVAVWFDLV        | -2.28 |
| sp Q43286 B4GT5_HUMAN | 388  | 29 | 353  | LLRPRRSLAALFFSLSSSLLYFYVA        | -2.28 |
| sp Q9H1B5 XYLT2_HUMAN | 865  | 29 | 827  | LVRRYKLAIAIALALLLQGLVWWSFGL      | -2.27 |
| sp Q6ICH7 ASPH2_HUMAN | 369  | 19 | 293  | TTAVITVACLLVLFVWYCY              | -2.26 |
| sp Q86SF2 GALT7_HUMAN | 657  | 28 | 628  | RLKIGFILRSLLVGSGFLGVVWSSLT       | -2.22 |
| sp Q86SR1 GLT10_HUMAN | 603  | 26 | 571  | RLQOVALVLAALVLLPNVGLWALYR        | -2.22 |
| sp Q9H3S3 TMP55_HUMAN | 457  | 29 | 384  | MRRGCVALGALGLAGAGVGSWLLVLYLC     | -2.22 |
| sp P00461 GOL4_HUMAN  | 696  | 25 | 660  | RIFQTLTLLTVFGLFYGAMLYYEL         | -2.2  |
| sp Q9BYC5 FUT8_HUMAN  | 575  | 19 | 550  | SWRWIMLILFAWGTLFYI               | -2.19 |
| sp P29965 CD40L_HUMAN | 261  | 28 | 211  | IFMYLLTVLITQMIGSALFVYLHRRRL      | -2.18 |
| sp Q9H1C3 GL8D2_HUMAN | 349  | 25 | 322  | LLRKINQVLLFLVILTCVILYKVV         | -2.18 |
| sp Q8IXK2 GLT12_HUMAN | 581  | 26 | 542  | LRRGREALVLLALLALAGLSVLR          | -2.18 |
| sp Q5H943 KKLC1_HUMAN | 113  | 22 | 89   | FYLLASSILCALIVFWKYRRF            | -2.16 |
| sp Q5U4P2 ASPH1_HUMAN | 390  | 33 | 292  | LIMLPWPLPASSALLTLLFGALTSFLWYCYRL | -2.14 |
| sp Q8IUS5 EPHX4_HUMAN | 362  | 33 | 319  | LMLTRSLFVSLVYCYGCLCASIHLLKLLWSL  | -2.09 |
| sp Q16706 MA2A1_HUMAN | 1144 | 20 | 1118 | FTVFGSAIFCVIFSLYMLM              | -2.09 |
| sp Q9NSB4 CHST7_HUMAN | 486  | 22 | 454  | YCKFALLLVYTLVLLVPSVL             | -2.07 |
| sp P52849 NDST2_HUMAN | 843  | 25 | 845  | LELHRLLIILLIIFSLGSMGFLAYVV       | -2.07 |
| sp P78562 PHEX_HUMAN  | 789  | 24 | 709  | RGTRIALVVFVGGTLVGLTFLV           | -2.07 |
| sp Q8NSD6 GBGT1_HUMAN | 347  | 25 | 320  | RRRLALGLGFCLLAGTSLVSLVWYL        | -2.04 |
| sp Q4G148 GXL1_HUMAN  | 440  | 23 | 417  | MRRYLRVVLVACVAGFCSLLYAF          | -2.04 |
| sp Q9BUJ0 ABHEA_HUMAN | 271  | 19 | 219  | QVALLGLSLLMLLVLVYGL              | -2.02 |
| sp Q9UBM8 MG24C_HUMAN | 478  | 24 | 435  | LRKRSTVSVFLGVVIFLLFMNLYI         | -2.02 |
| sp Q10472 GALT1_HUMAN | 559  | 25 | 531  | FAYCKVVLATSLVWLLDMFLLYF          | -2.01 |
| sp P00587 MFNG_HUMAN  | 321  | 26 | 293  | CRLPRGLGALLTLLCMGLLCLRYHL        | -2.01 |
| sp Q969X2 SIA7F_HUMAN | 333  | 19 | 273  | RSVAVFVILFALITILILYS             | -2.01 |
| sp Q9H2X3 CLC4M_HUMAN | 399  | 21 | 329  | ALVLQLLSFMLLAGVLAIVL             | -1.99 |
| sp P27487 DPP4_HUMAN  | 766  | 24 | 738  | WKVLLGLLGAAALVITITVPVLL          | -1.99 |
| sp Q9NSC7 SIA7A_HUMAN | 600  | 21 | 565  | VQVSLLLAVLFFLFFALPFSFI           | -1.98 |
| sp Q5T4J0 GCNT6_HUMAN | 391  | 21 | 368  | WVSCYCIITLQIIIIVTVLY             | -1.97 |
| sp Q8NBJ4 GOLM1_HUMAN | 401  | 20 | 366  | LVLAALVACIIVLGFNYWIA             | -1.96 |
| sp Q94923 GLCE_HUMAN  | 617  | 19 | 589  | YKTLIICALFTLVTLVLLW              | -1.95 |
| sp Q8NDV1 SIA7C_HUMAN | 305  | 25 | 277  | ILKRKSVIAVSFIAFLFLLVVRV          | -1.94 |
| sp Q69513 B4GT4_HUMAN | 344  | 22 | 314  | LSYKFRLLLLTCLTVVGGWAT            | -1.93 |
| sp Q7Z410 TMS9_HUMAN  | 1059 | 28 | 1009 | AACCRASIGVATSLVLLTGLVLLAF        | -1.92 |
| sp P26717 NKG2C_HUMAN | 231  | 27 | 134  | LTAEVLGIICVIMATVKTIVLIPFL        | -1.88 |
| sp Q07444 NKG2E_HUMAN | 240  | 27 | 143  | LTAEVLGIICVIMATVKTIVLIPFL        | -1.88 |
| sp Q8NET6 CHSTD_HUMAN | 341  | 27 | 310  | CCRRRVLAAACLGAALLLCAAPRSLR       | -1.87 |
| sp Q92185 SIA8A_HUMAN | 356  | 27 | 305  | TRRLPMGASALCVVLCWVIFPVYRL        | -1.87 |
| sp Q8NB16 XLT1_HUMAN  | 393  | 19 | 351  | YCALLLAAALVAFVYLYG               | -1.87 |
| sp Q13241 KLRD1_HUMAN | 179  | 26 | 148  | TTLWRISGLTGIICLSMSTLGILL         | -1.86 |
| sp Q8NCH0 CHSTE_HUMAN | 376  | 28 | 310  | LLLPSMLMFAVIVASSGLLMIERGILA      | -1.85 |
| sp Q9Y274 SIA10_HUMAN | 331  | 26 | 305  | MRYGLVAIFLSAVFLYYLHCLWGT         | -1.84 |
| sp P15291 B4GT1_HUMAN | 363  | 26 | 332  | WLNFLTFLCGSAGFLCSQLFSILL         | -1.83 |
| sp Q9NS00 C1GLT_HUMAN | 398  | 25 | 365  | LQRAGRLLVAVCALHLGVTLVYYLA        | -1.82 |
| sp Q9P2E5 CHPF2_HUMAN | 772  | 29 | 738  | LLALLRALPILGLSLGCSLLRVSWI        | -1.81 |
| sp Q92611 EDEM1_HUMAN | 657  | 27 | 630  | MQWRALVGLVLLRGLHGLVWLVFGL        | -1.78 |
| sp Q49A17 GLTL6_HUMAN | 601  | 25 | 570  | FLQOMTLFTVALIFPNVGLWLSLY         | -1.78 |
| sp Q9P2W7 B3GA1_HUMAN | 334  | 21 | 310  | RDRILAVLIVLPWTLITVW              | -1.77 |
| sp Q6Y288 B3GLT_HUMAN | 498  | 24 | 470  | ACWVLLAPPALLTCLSLAFGLA           | -1.77 |
| sp Q06430 GNT2B_HUMAN | 400  | 23 | 375  | LSMRYLFIISVSVIIVFVSFV            | -1.77 |
| sp Q8NCL4 GALT6_HUMAN | 622  | 19 | 593  | LRLAMVGCFAVFLFLLHR               | -1.74 |
| sp P32970 CD70_HUMAN  | 193  | 28 | 151  | YGCVLRALVPLVAGLVICLVQIRFA        | -1.73 |
| sp P22413 ENPP1_HUMAN | 925  | 24 | 828  | TYKVLVLSVCVLTTLGCIFGL            | -1.73 |
| sp P23510 TNFL4_HUMAN | 183  | 27 | 133  | LLVAVSVIQLGLLLCFTYICLHFSAL       | -1.73 |
| sp Q9HDC9 AFMAP_HUMAN | 416  | 25 | 355  | RVRVFTFLMLAVSLTVPLLGAAMLL        | -1.72 |
| sp Q9Y2A9 B3GN3_HUMAN | 372  | 19 | 343  | ATLILAGAFLLLSL                   | -1.71 |
| sp Q6UWU4 CF089_HUMAN | 347  | 23 | 268  | LLVIVYKVLATLGLLITAYFVI           | -1.71 |
| sp Q8NFL0 B3GN7_HUMAN | 401  | 24 | 371  | TVYRSLCLALALLAVTVFQRLT           | -1.7  |
| sp Q9Y4C5 CHST2_HUMAN | 530  | 25 | 456  | VFRKALVLCAGYALLVTLMLNLL          | -1.68 |
| sp Q43908 NKG2F_HUMAN | 158  | 24 | 64   | LTAEVLGIICVIMATVKTIVLI           | -1.66 |
| sp P50591 TNF10_HUMAN | 281  | 28 | 242  | LGQTCVLIIFTVLLQSLCAVATVYVFT      | -1.65 |
| sp Q8VW01 CANT1_HUMAN | 401  | 20 | 340  | RWKVILTFVGAAILWLLCS              | -1.62 |
| sp Q8N4A0 GALT4_HUMAN | 578  | 28 | 549  | AVRWTWAGKSCLLAFLTVAYIFVELLV      | -1.62 |
| sp Q8N428 GLT16_HUMAN | 558  | 25 | 533  | MRKIRANAILTVAWILGTFYVLYW         | -1.61 |
| sp P15907 SIAT1_HUMAN | 406  | 19 | 379  | KFSCCVLFLFVAVICVWK               | -1.61 |
| sp Q8WTT0 CLC4C_HUMAN | 213  | 29 | 171  | LWVFLQKVVSMAMVSIILLSCVCTVSSVV    | -1.59 |
| sp Q95395 CNT3_HUMAN  | 438  | 24 | 405  | LHYLWALGCYMLLATVALKLSFRL         | -1.59 |
| sp Q14788 TNF11_HUMAN | 317  | 25 | 245  | MFVALLGLGLQGVVCSVALFFYFRA        | -1.58 |
| sp Q8IUC8 GLT13_HUMAN | 556  | 28 | 528  | MRRFYCKVVLATSLMWWLVDFVLLLYF      | -1.56 |
| sp P46695 IEX1_HUMAN  | 156  | 19 | 55   | AKRLLFLLTIVFCQILMA               | -1.54 |
| sp P22760 AAD_HUMAN   | 399  | 19 | 378  | RKSLYLLVIGLIAYIYT                | -1.53 |
| sp Q0P6D2 FA69C_HUMAN | 419  | 22 | 374  | TLLAFAAWTAGVWVLAALLLRA           | -1.52 |
| sp Q9UBV7 B4GT7_HUMAN | 327  | 25 | 276  | RKCSVHFLVACLCLGFFSLLWLQL         | -1.51 |
| sp Q6P531 GGT6_HUMAN  | 493  | 23 | 415  | TWARVVAALLLAVGCSLAVRQL           | -1.5  |
| sp Q07075 AMPE_HUMAN  | 957  | 23 | 916  | VAILCAVVGGLVGLVAGLGLTR           | -1.49 |
| sp Q9UQQ1 NALDL_HUMAN | 740  | 26 | 712  | WTKVLGLGLGAAALLGLGILGHFAI        | -1.49 |
| sp Q96BA8 CR3L1_HUMAN | 519  | 23 | 125  | TGTCMLVAALCFVVLGSLVPCL           | -1.48 |
| sp Q8TEY5 CR3L4_HUMAN | 395  | 28 | 82   | TSTCVLILLFSLAILIPSF              | -1.48 |
| sp P55073 IOD3_HUMAN  | 278  | 24 | 236  | CLVLFPRFLGTAFMLWLLDFLCIR         | -1.47 |
| sp Q95461 LARGE_HUMAN | 756  | 23 | 726  | RRKFLAASLLCIPAITWYLF             | -1.47 |
| sp P09172 DOPO_HUMAN  | 617  | 20 | 580  | AAMFYSTAVAILVILVAAL              | -1.46 |





|                       |      |    |      |                            |      |
|-----------------------|------|----|------|----------------------------|------|
| sp Q96A11 G3ST3_HUMAN | 431  | 19 | 397  | SRRKILLVLGCSTVSLLI         | 0,54 |
| sp P08910 ABHD2_HUMAN | 425  | 22 | 392  | AVFDGVKLAAVAALYVIVRCL      | 0,57 |
| sp P67812 SC11A_HUMAN | 179  | 26 | 136  | LYYQVLNFGMIVSSALMIWKLMVIT  | 0,57 |
| sp O75356 ENTP5_HUMAN | 428  | 20 | 407  | ATSWGTVFFMLVVCVCSAV        | 0,59 |
| sp Q10981 FUT2_HUMAN  | 343  | 19 | 317  | FSFPMAHFILFVFTVSTIF        | 0,87 |
| sp O00468 AGRIN_HUMAN | 2067 | 22 | 2036 | LRPLLPLVVAACVLPGAGGTC      | 0,97 |
| sp Q14494 NF2L1_HUMAN | 772  | 26 | 740  | YLTEGLLQFTILLSLIGVRVDVDTYL | 0,98 |
| sp Q9UIR0 BTNL2_HUMAN | 455  | 21 | 431  | FPGYNLGSAVASFLFILLTMK      | 1,19 |
| sp Q94905 ERLN2_HUMAN | 339  | 20 | 316  | LGAVVAVASSFFCASLFSAV       | 1,38 |
| sp Q9NST1 PLPL3_HUMAN | 481  | 24 | 452  | RGWLSLFAAGCGFLGFYHVGATRCL  | 1,47 |
| sp Q96AD5 PLPL2_HUMAN | 504  | 24 | 474  | TWNISFAGCGFLGVYVGVASCLR    | 1,51 |
| sp Q6P179 ERAP2_HUMAN | 960  | 21 | 920  | RGFYCLTAILPQICICSQFSV      | 2,19 |
